# Supplementary material for: Composite nanoparticles derived by self-assembling of hydrophobic polysaccharide derivatives and lignin
Source: Springer Nature journal article supplement (doi:10.1007/s10570-022-04504-x), 2022-03-26
Supplement: MOESM1 [file 20261136]

## Supplementary material for

# Composite nanoparticles derived by self-assembling of hydrophobic polysaccharide derivatives and lignin

Martin Gericke, Jonas Bergrath, Margit Schulze, Thomas Heinze

**Table S1** Molecular structure characteristics of Organosolv lignin employed in the study (Bergs et al. 2019).

| ratio of monomer units, % <sup>a)</sup> |       |       | ratio of most abundant linkages, % <sup>b)</sup> |      |      |       | molecular weight <sup>c)</sup> |                        |
|-----------------------------------------|-------|-------|--------------------------------------------------|------|------|-------|--------------------------------|------------------------|
| H                                       | G     | S     | A                                                | B    | C    | D     | M <sub>n</sub> , g/mol         | M <sub>w</sub> , g/mol |
| 21.17                                   | 53.54 | 25.29 | 62.62                                            | 7.70 | 8.00 | 21.68 | 1139                           | 2146                   |

a) H-unit: *p*-hydroxyphenyl (derived from *p*-coumaryl alcohol), G-unit: guaiacyl (derived from coniferyl alcohol), S-unit: syringyl (derived from sinapyl alcohol);  
b) A-linkage:  $\beta$ -aryl ether, B-linkage: phenyl coumaran, C-linkage: resinol, D-linkage: unsaturated ester; c) M<sub>n</sub>: number average molecular weight, M<sub>w</sub>: weight average molecular weight.

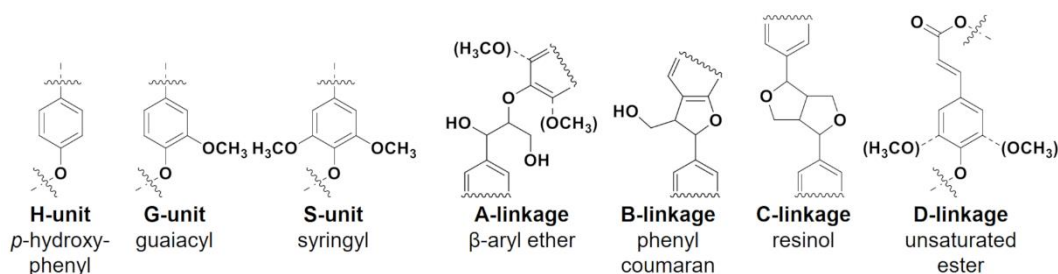

**Fig. S1** Molecular structure of major structural features in Organosolv lignin.

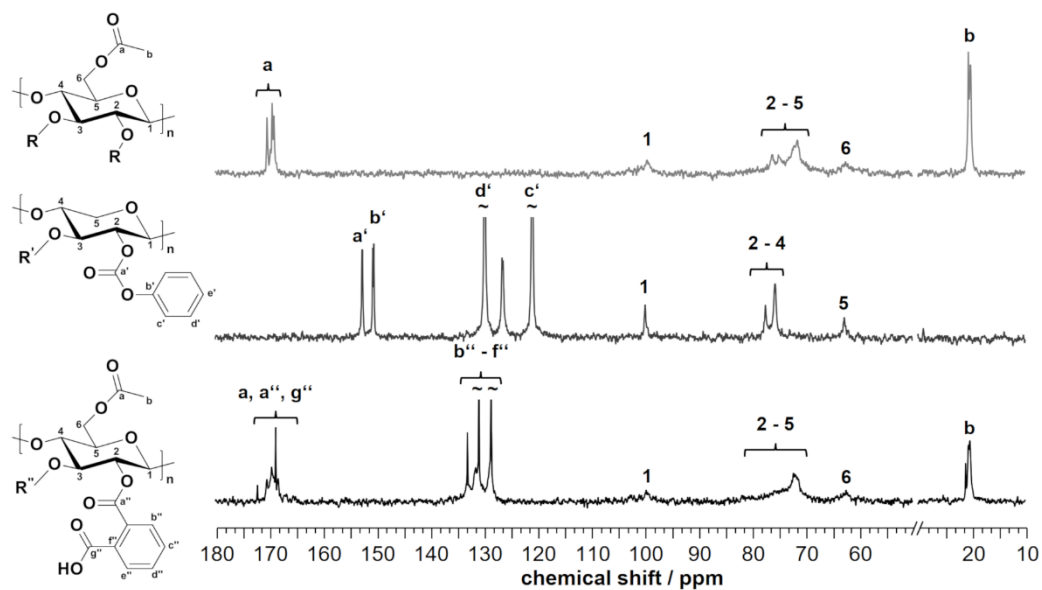

**Fig. S2**  $^{13}\text{C}$ -NMR spectra of cellulose acetate (top), xylan phenyl carbonate (middle), and cellulose acetate phthalate (bottom), recorded in  $\text{DMSO-}d_6$ .

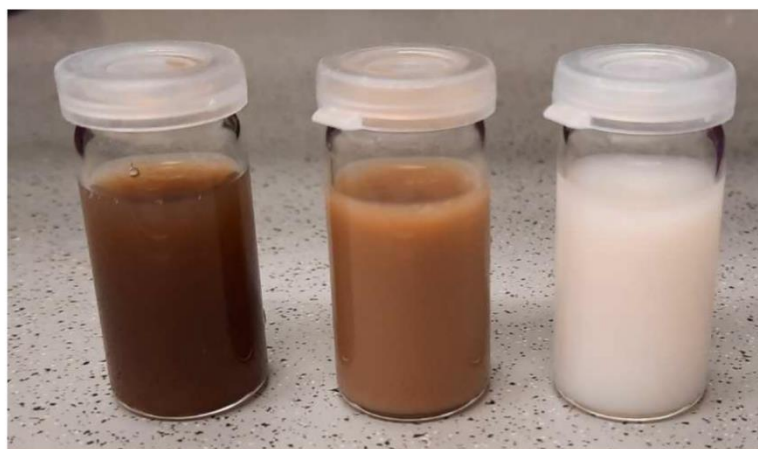

**Fig. S3** Images of aqueous particle dispersions prepared by dialysis of organic solutions containing either lignin (left), xylan phenyl carbonate (right), or both (middle).

## References

- Bergs M et al. (2019) Miscanthus x giganteus stem versus leaf-derived lignins differing in monolignol ratio and linkage International Journal of Molecular Sciences 20:1200 doi:<https://doi.org/10.3390/ijms20051200>
